# Supplementary material for: Genomic and immunogenomic analysis of three prognostic signature genes in LUAD
Source: Research Square preprint supplement (doi:10.21203/rs.3.rs-1908237/v1), 2022-08-03
Supplement: Supplementary file 1 [file 3c9bf0576dbdfa3edeadd5f4.xlsx]

## Sheet: SheetName
cancertype	symbol	cell_type	cor	p_value	fdr	group		cor	group
LUAD	NFE2	Cytotoxic	-0.344204	3.06405e-14	2.53902e-13	Negative correlation		0.344204	Negative correlation
LUAD	NFE2	Exhausted	-0.306381	1.87508e-11	1.96963e-10	Negative correlation		0.306381	Negative correlation
LUAD	NFE2	Th1	-0.298346	6.54524e-11	6.73197e-10	Negative correlation		0.298346	Negative correlation
LUAD	NFE2	NK	-0.286613	3.79332e-10	3.46964e-09	Negative correlation		0.286613	Negative correlation
LUAD	NFE2	InfiltrationScore	-0.28257	6.823e-10	5.27896e-09	Negative correlation		0.28257	Negative correlation
LUAD	MMP12	nTreg	-0.25008	5.46019e-08	7.00015e-07	Negative correlation		0.25008	Negative correlation
LUAD	NFE2	CD8_T	-0.236228	2.96826e-07	2.25611e-06	Negative correlation		0.236228	Negative correlation
LUAD	NFE2	iTreg	-0.227817	7.89583e-07	5.31799e-06	Negative correlation		0.227817	Negative correlation
LUAD	NFE2	Macrophage	-0.203367	1.1032e-05	9.102e-05	Negative correlation		0.203367	Negative correlation
LUAD	NFE2	Tfh	-0.184583	6.8234e-05	0.000254073	Negative correlation		0.184583	Negative correlation
LUAD	NFE2	Bcell	-0.156088	0.000781627	0.00534994	Negative correlation		0.156088	Negative correlation
LUAD	MMP12	CD8_T	-0.151103	0.00115138	0.00444912	Negative correlation		0.151103	Negative correlation
LUAD	NFE2	Central_memory	-0.146465	0.00163393	0.00621978	Negative correlation		0.146465	Negative correlation
LUAD	MMP12	Th1	-0.142291	0.00222016	0.00654825	Negative correlation		0.142291	Negative correlation
LUAD	HOXC8	Neutrophil	-0.112124	0.0161353	0.0313854	Negative correlation		0.112124	Negative correlation
LUAD	MMP12	Exhausted	-0.103432	0.0265353	0.0589448	Negative correlation		0.103432	Negative correlation
LUAD	MMP12	Cytotoxic	-0.0913751	0.0501661	0.0924862	Negative correlation		0.0913751	Negative correlation
LUAD	NFE2	nTreg	-0.0822488	0.078031	0.148291	Negative correlation		0.0822488	Negative correlation
LUAD	NFE2	NKT	-0.0738499	0.113705	0.238183	Negative correlation		0.0738499	Negative correlation
LUAD	NFE2	Gamma_delta	-0.0704572	0.131323	0.277172	Negative correlation		0.0704572	Negative correlation
LUAD	MMP12	Bcell	-0.060079	0.198371	0.392762	Negative correlation		0.060079	Negative correlation
LUAD	NFE2	Tr1	-0.0585438	0.210103	0.420123	Negative correlation		0.0585438	Negative correlation
LUAD	HOXC8	nTreg	-0.0570043	0.222362	0.339196	Negative correlation		0.0570043	Negative correlation
LUAD	HOXC8	Monocyte	-0.0557571	0.232661	0.444449	Negative correlation		0.0557571	Negative correlation
LUAD	MMP12	Central_memory	-0.0556433	0.233618	0.38291	Negative correlation		0.0556433	Negative correlation
LUAD	HOXC8	NK	-0.0539196	0.248443	0.37233	Negative correlation		0.0539196	Negative correlation
LUAD	MMP12	InfiltrationScore	0.0502201	0.282442	0.386651	Positive correlation		0.0502201	Positive correlation
LUAD	NFE2	CD4_T	0.0508489	0.276452	0.380827	Positive correlation		0.0508489	Positive correlation
LUAD	NFE2	MAIT	0.0605386	0.194953	0.376667	Positive correlation		0.0605386	Positive correlation
LUAD	MMP12	NKT	0.0665138	0.154372	0.298122	Positive correlation		0.0665138	Positive correlation
LUAD	MMP12	CD8_naive	0.0876757	0.0602529	0.140685	Positive correlation		0.0876757	Positive correlation
LUAD	HOXC8	CD4_T	0.106313	0.0225823	0.0474132	Positive correlation		0.106313	Positive correlation
LUAD	HOXC8	Central_memory	0.106446	0.0224134	0.0587518	Positive correlation		0.106446	Positive correlation
LUAD	NFE2	CD4_naive	0.107301	0.0213501	0.119129	Positive correlation		0.107301	Positive correlation
LUAD	MMP12	DC	0.111771	0.0164748	0.0423178	Positive correlation		0.111771	Positive correlation
LUAD	NFE2	Effector_memory	0.133584	0.00410291	0.012318	Positive correlation		0.133584	Positive correlation
LUAD	MMP12	Th17	0.137961	0.00302614	0.00735515	Positive correlation		0.137961	Positive correlation
LUAD	HOXC8	DC	0.144955	0.00182727	0.00704511	Positive correlation		0.144955	Positive correlation
LUAD	MMP12	Th2	0.155508	0.000818169	0.00699331	Positive correlation		0.155508	Positive correlation
LUAD	MMP12	CD4_T	0.192254	3.3109e-05	0.000169057	Positive correlation		0.192254	Positive correlation
LUAD	NFE2	CD8_naive	0.227948	7.77937e-07	8.90271e-06	Positive correlation		0.227948	Positive correlation
LUAD	NFE2	Neutrophil	0.287803	3.18573e-10	1.64026e-09	Positive correlation		0.287803	Positive correlation
LUAD	NFE2	Th17	0.360898	1.3472e-15	1.36772e-14	Positive correlation		0.360898	Positive correlation
LUAD	HOXC8	Bcell	-0.0489126	0.295177	0.507143
LUAD	NFE2	Monocyte	-0.0457151	0.327914	0.544938
LUAD	HOXC8	Tr1	0.0443	0.343125	0.56885
LUAD	HOXC8	CD8_naive	-0.0435184	0.351715	0.535641
LUAD	MMP12	Macrophage	0.0434989	0.351931	0.50288
LUAD	MMP12	Tr1	0.0423059	0.365308	0.591238
LUAD	HOXC8	Macrophage	0.0386946	0.407694	0.556922
LUAD	MMP12	iTreg	-0.0384347	0.410852	0.563543
LUAD	MMP12	Gamma_delta	0.0331842	0.477716	0.645363
LUAD	HOXC8	InfiltrationScore	0.0312873	0.503255	0.610646
LUAD	HOXC8	Th17	0.0305267	0.513695	0.627236
LUAD	HOXC8	Tfh	0.0296336	0.526094	0.64233
LUAD	MMP12	Effector_memory	-0.028807	0.537705	0.671121
LUAD	HOXC8	NKT	0.0285332	0.541578	0.700143
LUAD	MMP12	NK	-0.0277833	0.552259	0.673276
LUAD	HOXC8	MAIT	0.0251626	0.590373	0.756879
LUAD	MMP12	MAIT	-0.0236688	0.612626	0.773803
LUAD	MMP12	CD4_naive	0.0220152	0.63768	0.842998
LUAD	NFE2	DC	-0.0218504	0.6402	0.740339
LUAD	HOXC8	CD8_T	0.0142034	0.761269	0.858509
LUAD	MMP12	Tfh	0.0131951	0.777756	0.845732
LUAD	HOXC8	Cytotoxic	0.0123183	0.792173	0.861843
LUAD	HOXC8	iTreg	0.0118401	0.800067	0.875395
LUAD	HOXC8	Th2	0.0114783	0.806054	0.892644
LUAD	HOXC8	Effector_memory	-0.00956003	0.837973	0.897647
LUAD	MMP12	Monocyte	-0.00856069	0.854712	0.928712
LUAD	HOXC8	CD4_naive	0.00736514	0.874822	0.954619
LUAD	HOXC8	Exhausted	0.00188636	0.967816	0.98044
LUAD	HOXC8	Th1	-0.00139181	0.976251	0.984977
LUAD	NFE2	Th2	0.00107489	0.981657	0.990663
LUAD	HOXC8	Gamma_delta	0.000908605	0.984495	0.99169
LUAD	MMP12	Neutrophil	-0.000130934	0.997765	0.998286
