# Supplementary material for: Genomic and immunogenomic analysis of three prognostic signature genes in LUAD
Source: Research Square preprint supplement (doi:10.21203/rs.3.rs-1908237/v1), 2022-08-03
Supplement: Supplementary file 2 [file 87b325c5ca04699d009a3e56.xlsx]

## Sheet: SheetName
cancertype	symbol	pathway	fdr	class	diff	entrez
LUAD	HOXC8	Apoptosis	0.25643	None	0.254012205	3224
LUAD	HOXC8	CellCycle	0.00331334	Activation	0.588042618	3224
LUAD	HOXC8	DNADamage	0.693926	None	0.101863092	3224
LUAD	HOXC8	EMT	0.25643	None	0.376070519	3224
LUAD	HOXC8	Hormone AR	0.693926	None	0.101501967	3224
LUAD	HOXC8	Hormone ER	0.211168	None	-0.159531825	3224
LUAD	HOXC8	PI3KAKT	0.759311	None	-0.094059645	3224
LUAD	HOXC8	RASMAPK	0.693926	None	0.116684347	3224
LUAD	HOXC8	RTK	0.405079	None	-0.2756294	3224
LUAD	HOXC8	TSCmTOR	0.808907	None	0.040783242	3224
LUAD	MMP12	Apoptosis	2.1667e-05	Activation	0.691952197	4321
LUAD	MMP12	CellCycle	8.49962e-08	Activation	0.930847066	4321
LUAD	MMP12	DNADamage	0.803108	None	-0.035787114	4321
LUAD	MMP12	EMT	2.54653e-07	Activation	1.177682194	4321
LUAD	MMP12	Hormone AR	0.159216	None	-0.277683835	4321
LUAD	MMP12	Hormone ER	0.19871	None	0.121665288	4321
LUAD	MMP12	PI3KAKT	0.19871	None	-0.339904189	4321
LUAD	MMP12	RASMAPK	0.0430027	Inhibition	-0.468785722	4321
LUAD	MMP12	RTK	0.630782	None	-0.142286759	4321
LUAD	MMP12	TSCmTOR	0.630782	None	0.095983643	4321
LUAD	NFE2	Apoptosis	0.013602	Inhibition	-0.463877161	4778
LUAD	NFE2	CellCycle	0.000191612	Inhibition	-0.695268458	4778
LUAD	NFE2	DNADamage	0.06651	None	-0.276413934	4778
LUAD	NFE2	EMT	0.026625	Inhibition	-0.558689538	4778
LUAD	NFE2	Hormone AR	0.0415181	Inhibition	-0.365248297	4778
LUAD	NFE2	Hormone ER	0.418146	None	0.063508088	4778
LUAD	NFE2	PI3KAKT	0.06651	None	0.450163403	4778
LUAD	NFE2	RASMAPK	0.026625	Activation	0.515582479	4778
LUAD	NFE2	RTK	0.39866	None	0.197440902	4778
LUAD	NFE2	TSCmTOR	0.0430068	Activation	0.372828328	4778
