# Supplementary material for: Genomic and immunogenomic analysis of three prognostic signature genes in LUAD
Source: Research Square preprint supplement (doi:10.21203/rs.3.rs-1908237/v1), 2022-08-03
Supplement: Supplementary file 3 [file eaf744004f0999c982e8a50e.csv]

_MEMBER_MyList	_LogP_MyList	GO	Description	_PATTERN_	_RANK_	CHILD_GO_MyList
1	-16.826038977982698	GO:0050896	response to stimulus	M1	1	GO:0031347 regulation of defense response
1	-14.951564611045976	GO:0044419	biological process involved in interspecies interaction between organisms	M1	1	GO:0045087 innate immune response
1	-14.747715237186961	GO:0023052	signaling	M1	1	GO:0070098 chemokine-mediated signaling pathway
1	-14.643672403540673	GO:0002376	immune system process	M1	1	GO:0002697 regulation of immune effector process
1	-14.379163393880882	GO:0050789	regulation of biological process	M1	1	GO:0050865 regulation of cell activation
1	-14.089424923756678	GO:0040011	locomotion	M1	1	GO:0030595 leukocyte chemotaxis
1	-13.732321250710516	GO:0048518	positive regulation of biological process	M1	1	GO:0032103 positive regulation of response to external stimulus
1	-13.23991622169348	GO:0009987	cellular process	M1	1	GO:0001775 cell activation
1	-9.653655790088344	GO:0065007	biological regulation	M1	1	GO:0072503 cellular divalent inorganic cation homeostasis
1	-7.4513274287094795	GO:0048519	negative regulation of biological process	M1	1	GO:0032102 negative regulation of response to external stimulus
1	-6.031697056429796	GO:0022610	biological adhesion	M1	1	GO:1903037 regulation of leukocyte cell-cell adhesion
1	-5.717565237419524	GO:0051179	localization	M1	1	GO:0050764 regulation of phagocytosis
1	-4.239263486841493	GO:0032502	developmental process	M1	1	GO:0051960 regulation of nervous system development
1	-4.182038093441738	GO:0032501	multicellular organismal process	M1	1	GO:0032649 regulation of interferon-gamma production
1	-3.948915237872694	GO:0008152	metabolic process	M1	1	GO:0045859 regulation of protein kinase activity
1	-3.6210745840194285	GO:0110148	biomineralization	M1	1	GO:0030502 negative regulation of bone mineralization
1	-2.320982642063244	GO:0007610	behavior	M1	1	GO:0007626 locomotory behavior
